# Supplementary material for: A new rhodamine-based chemosensor for turn-on fluorescent detection of Fe3+
Source: Royal Society of Chemistry journal article supplement (doi:10.1039/c5ay00568j), 2015-01-01
Supplement: c5ay00568j1.pdf [file c5ay00568j1.pdf]

Electronic Supplementary Material (ESI) for Analytical Methods

# A new rhodamine-based chemosensor for turn-on fluorescent detection of Fe<sup>3+</sup>

XiangHan, Dong-En Wang, Shen Chen, Longlong Zhang, Yadan Guo, Jinyi Wang\*

*College of Science, Northwest A&F University, Yangling, Shaanxi 712100, PR China*

\* Corresponding author. Tel.: +86 29 87082520; fax: +86 29 87082520.

*E-mail address:* [jywang@nwsuaf.edu.cn](mailto:jywang@nwsuaf.edu.cn) (J. Wang).

**SI 1. The calculation method for the quantum yields.** The quantum yields for fluorescence were obtained by comparison of the integrated area of the corrected emission spectrum of the samples with that of a solution of rhodamine B standard ( $\phi_F$  0.69 in ethanol).<sup>S1</sup> The quantum efficiency of the metal-free and metal-bound RH-Fe was measured by using a dilute sample in H<sub>2</sub>O–CH<sub>3</sub>CN (7:3 v/v). The quantum yields were calculated with the expression in equation (Eq. 1):

$$\phi_u = \frac{A_s}{A_u} * \frac{F_u}{F_s} * \frac{nu^2}{ns^2} * \phi_s \quad (\text{Eq. 1})$$

where  $\phi$  is the quantum yield, subscript  $s$  stands for the reference and  $u$  for the sample,  $A$  is the absorbance at the excitation wavelength,  $n$  is the refractive index, and  $F$  is the emission integrated area.

**Table S1.** Fluorescence quantum yield of RH-Fe.

| Series                 | Maximum absorption wavelength (nm) | Maximum absorption | Start (nm) | End (nm) | Integral area of discharge | Fluorescence quantum yield |
|------------------------|------------------------------------|--------------------|------------|----------|----------------------------|----------------------------|
| Rhodamin B             | 547                                | 0.022              | 547        | 675      | 30211.964                  | 0.69                       |
| RH-Fe+Fe <sup>3+</sup> | 561                                | 0.010              | 561        | 675      | 10851.316                  | 0.24                       |

**SI 2. Study on the selectivity of RH-Fe.**

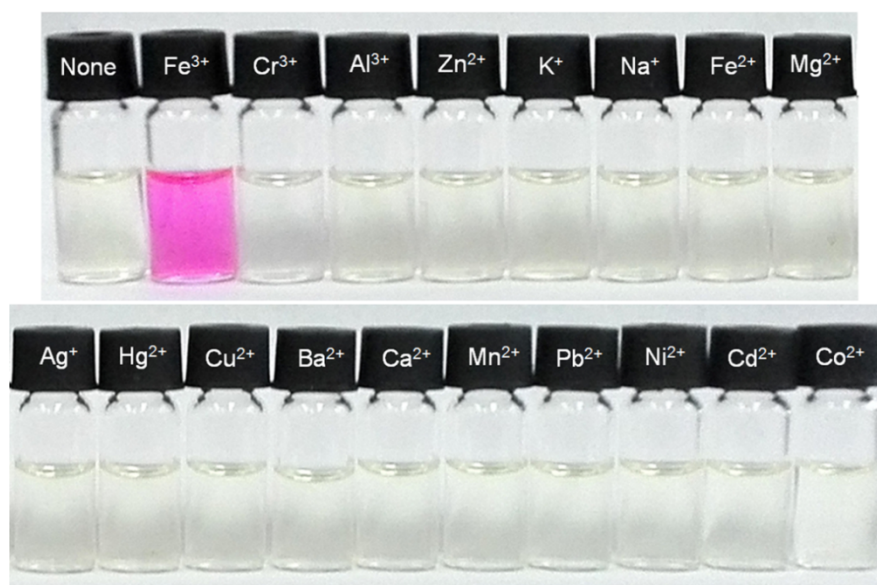

**Figure S1.** Color responses of RH-Fe (20 μM) in the presence of various metal ions (200 μM).

### SI 3. Study on the selectivity of RH-Fe by UV-visible absorption spectra.

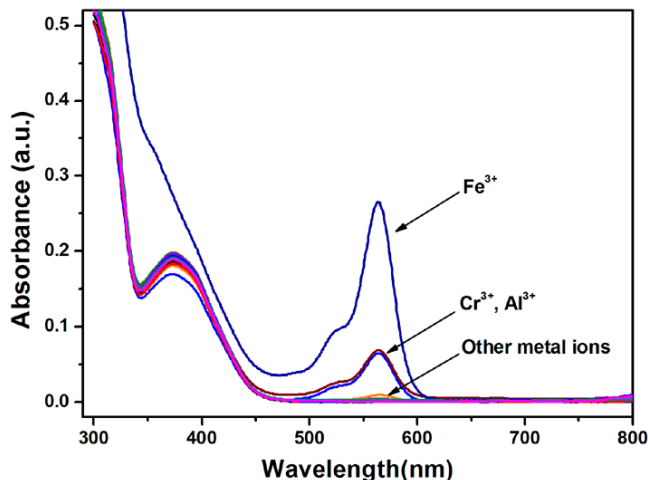

**Figure S2.** Absorbance spectra of RH-Fe (20  $\mu\text{M}$ ) in the presence of different metal ions (200  $\mu\text{M}$ ).

**SI 4. The calculation method for the detection limit.** The limit of detection (LOD) for RH-Fe was calculated based on the fluorescence titration.<sup>S1</sup> To determine the S/N ratio, the emission intensity of RH-Fe without cations was measured by 10 times and the standard deviation of blank measurements was determined. Then, the linear range for  $\text{Fe}^{3+}$  was determined. The detection limit was calculated with the equation (Eq. 2) at  $S/N=3$ , in which  $\sigma$  is the standard deviation of the background and  $S$  is the sensitivity.

$$LOD = 3 \times \frac{\sigma}{S} \quad (\text{Eq. 2})$$

**SI 5. The calculation method for the binding constant.** The binding constant was determined using the Benesi-Hildebrand equation (Eq. 3):<sup>S2</sup>

$$\frac{1}{I - I_0} = \frac{1}{K\alpha(I_{max} - I_0)[M^{x+}]^n} + \frac{1}{I_{max} - I_0} \quad (\text{Eq. 3})$$

where  $I$  is the measured fluorescence (absorption) intensity,  $I_{max}$  and  $I_0$  are the signals with saturated cations and without cations, respectively, and  $[M^{x+}]$  represent the concentrations of the cations.

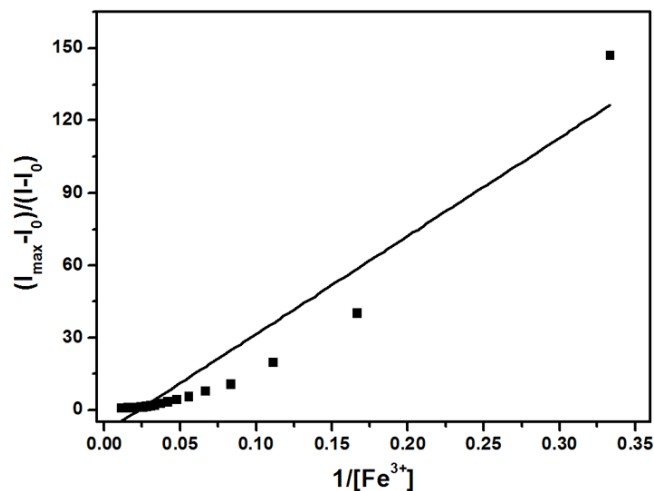

**Figure S3.** The relationship between  $(I_{\max}-I_0)/(I-I_0)$  and  $1/[\text{Fe}^{3+}]$ .

**SI 6. The mechanism of RH-Fe for  $\text{Fe}^{3+}$  detection.**

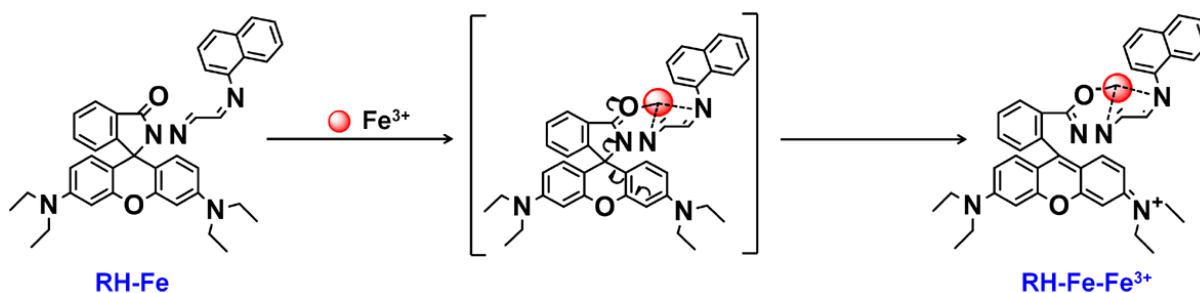

**Scheme S1.** Proposed mechanism for the fluorescent changes of RH-Fe upon the addition of  $\text{Fe}^{3+}$ .

**SI 7. Analysis of  $\text{Fe}^{3+}$  in real samples using probe RH-Fe.**

**Table S2.** Analytical results for detection of  $\text{Fe}^{3+}$  in real samples.

| Samples <sup>a</sup> | $\text{Fe}^{3+}$ spiked<br>( $\mu\text{M}$ ) | $\text{Fe}^{3+}$ recovery (n=3)<br>( $\mu\text{M}$ ) | Recovery<br>(%) |
|----------------------|----------------------------------------------|------------------------------------------------------|-----------------|
| Tap water            | 5                                            | 5.68±1.7                                             | 113.6           |
|                      | 10                                           | 7.73±2.4                                             | 77.3            |
|                      | 15                                           | 13.26±2.7                                            | 88.4            |
| river water          | 5                                            | 5.64±0.05                                            | 112.8           |
|                      | 10                                           | 8.65±1.32                                            | 88.5            |
|                      | 15                                           | 13.39±1.22                                           | 89.3            |

<sup>a</sup>The sample contained 30% acetonitrile.

**Table S3.** Comparison of fluorescent probes for Fe<sup>3+</sup>

| Probe                                                                               | $\lambda_{\text{ex}}/\lambda_{\text{em}}$ (nm) | Detection medium                                               | Detection limit | Ref       |
|-------------------------------------------------------------------------------------|------------------------------------------------|----------------------------------------------------------------|-----------------|-----------|
| 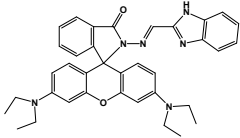   | 520/582                                        | CH <sub>3</sub> CN:H <sub>2</sub> O<br>(95:5, v/v)<br>solution | 15 nM.          | S3        |
|    | 562/593                                        | CH <sub>3</sub> CN:H <sub>2</sub> O<br>(3:2, v/v)<br>solution  | 1.8 $\mu$ M.    | S4        |
|    | 530/550                                        | THF:H <sub>2</sub> O<br>(99:1, v/v)<br>solution                | 4.8 $\mu$ M     | S5        |
|    | 260/345                                        | DMSO:H <sub>2</sub> O<br>(50:50 v/v)<br>solution               | 0.7 $\mu$ M     | S6        |
|  | 315/498                                        | DMSO:H <sub>2</sub> O<br>(1:1, v/v)<br>solution                | 3.49 $\mu$ M    | S7        |
|  | 550/585                                        | CH <sub>3</sub> OH:HEPES<br>(1:1, v/v)<br>solution             | 0.2 $\mu$ M     | S8        |
|  | 558/580                                        | CH <sub>3</sub> OH solution                                    | 5 $\mu$ M.      | S9        |
|  | 520/580                                        | CH <sub>3</sub> CN:H <sub>2</sub> O<br>(3:7, v/v) solution     | 0.27 $\mu$ M    | This work |

### S8. NMR spectra of Compound 1, 2, and RH-Fe.

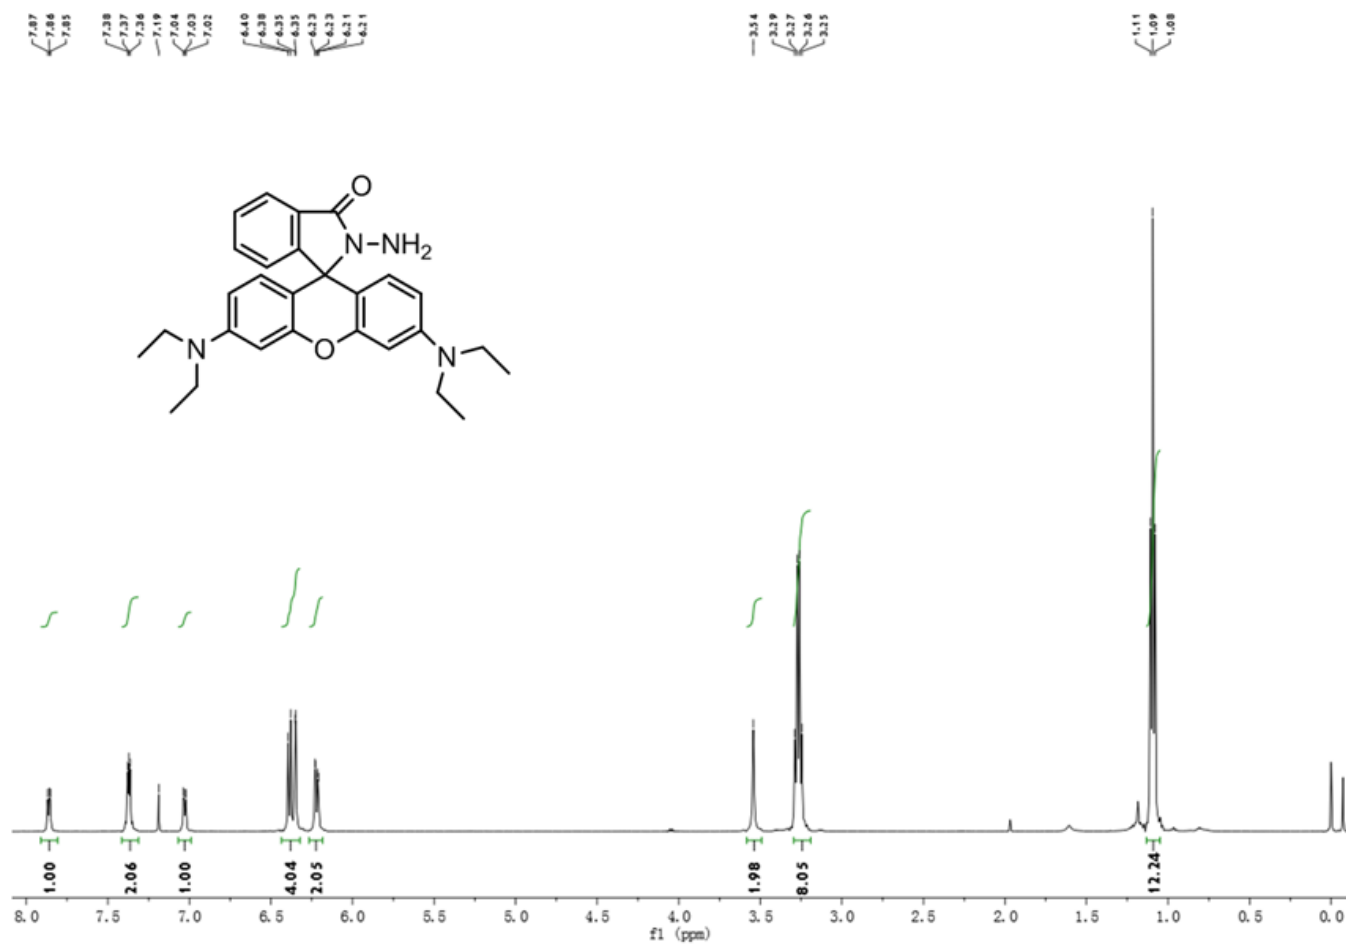

Figure S4. <sup>1</sup>H-NMR spectrum of Compound 1.

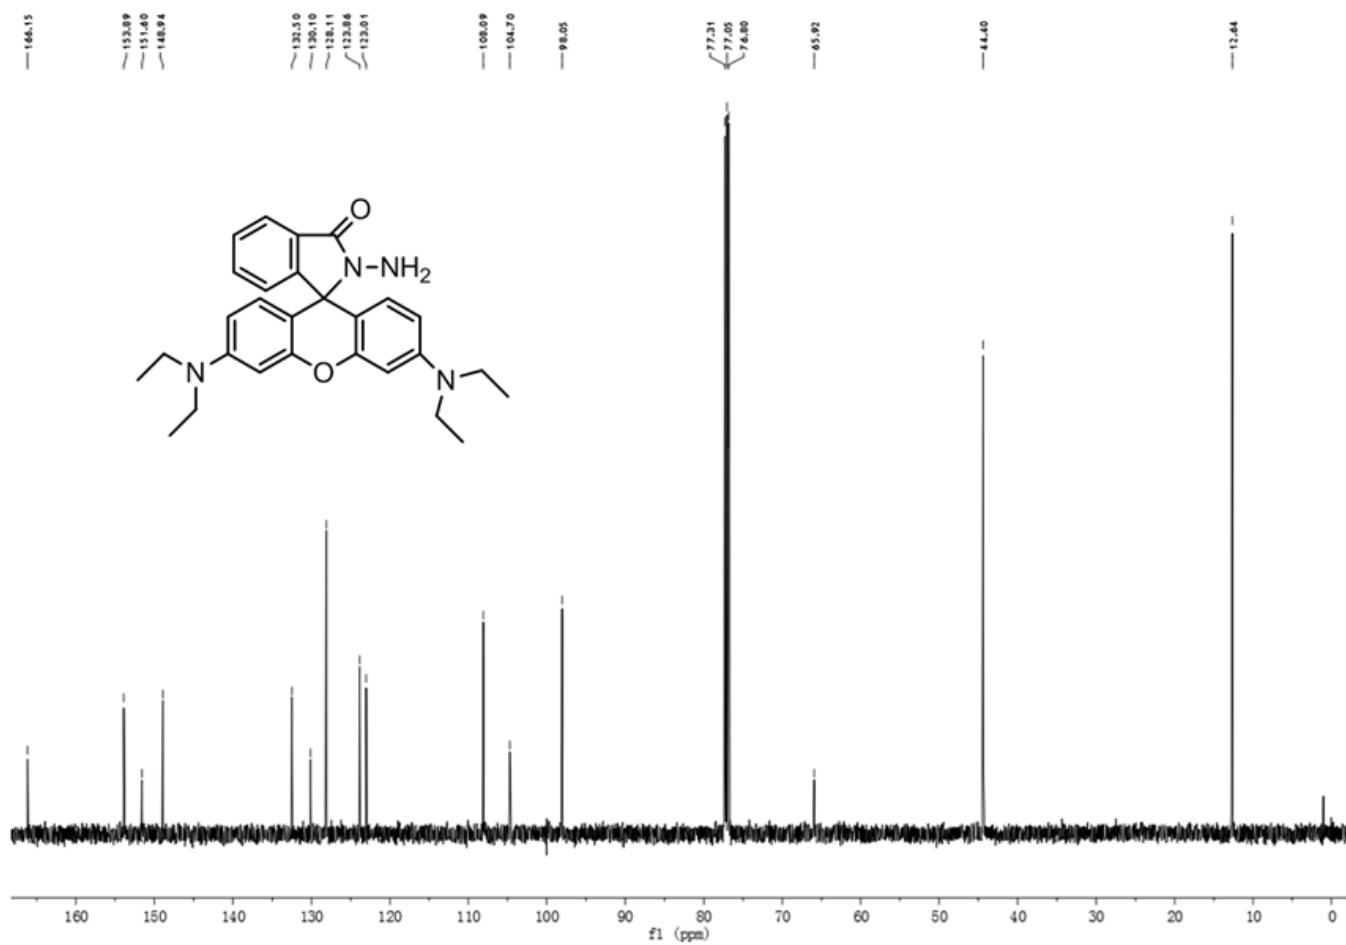

Figure S5. <sup>13</sup>C-NMR spectrum of Compound 1.

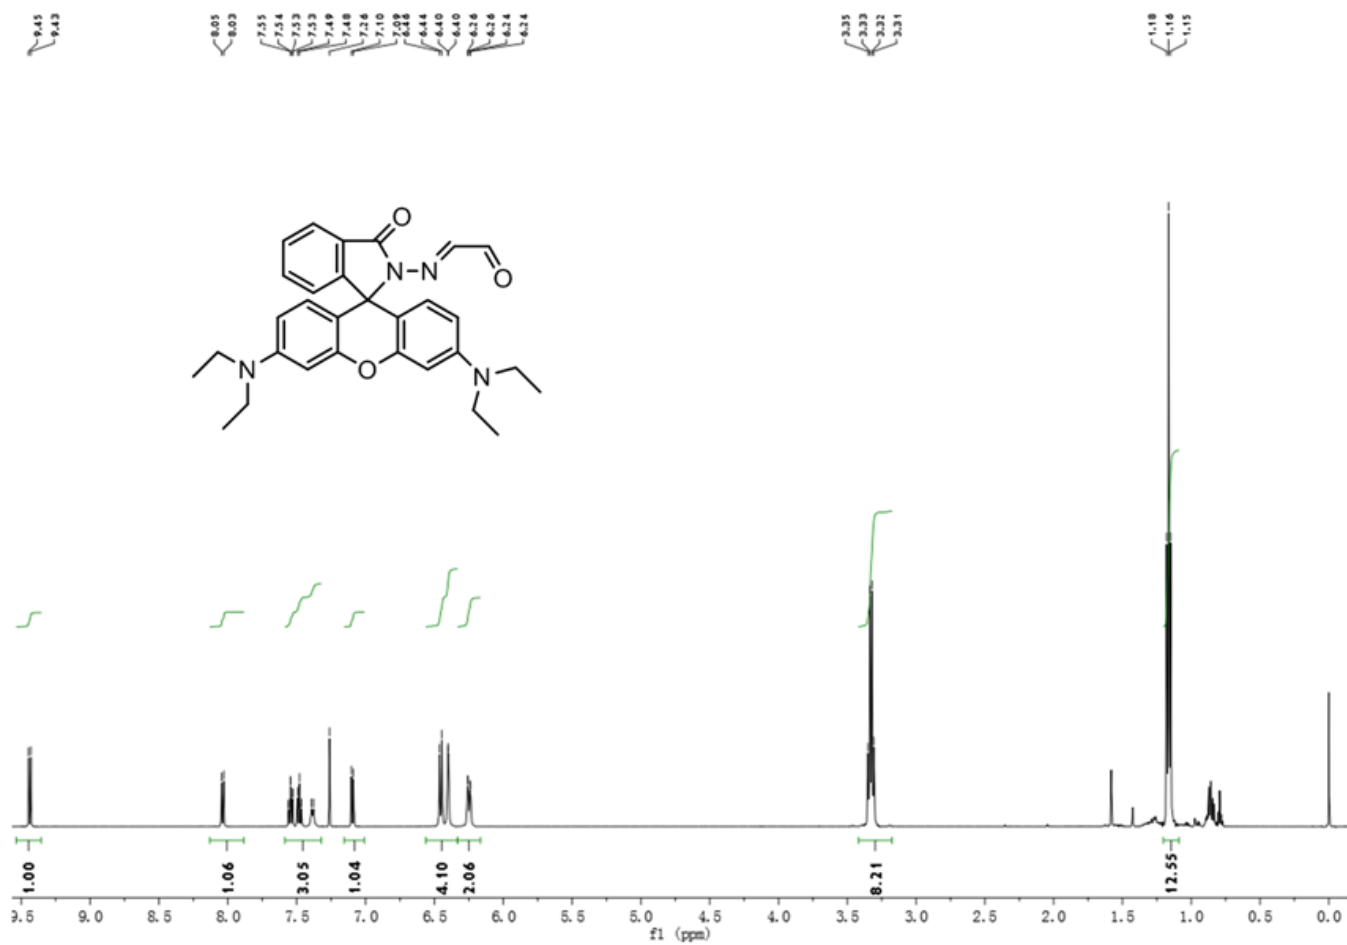

**Figure S6.** <sup>1</sup>H-NMR spectrum of Compound 2.



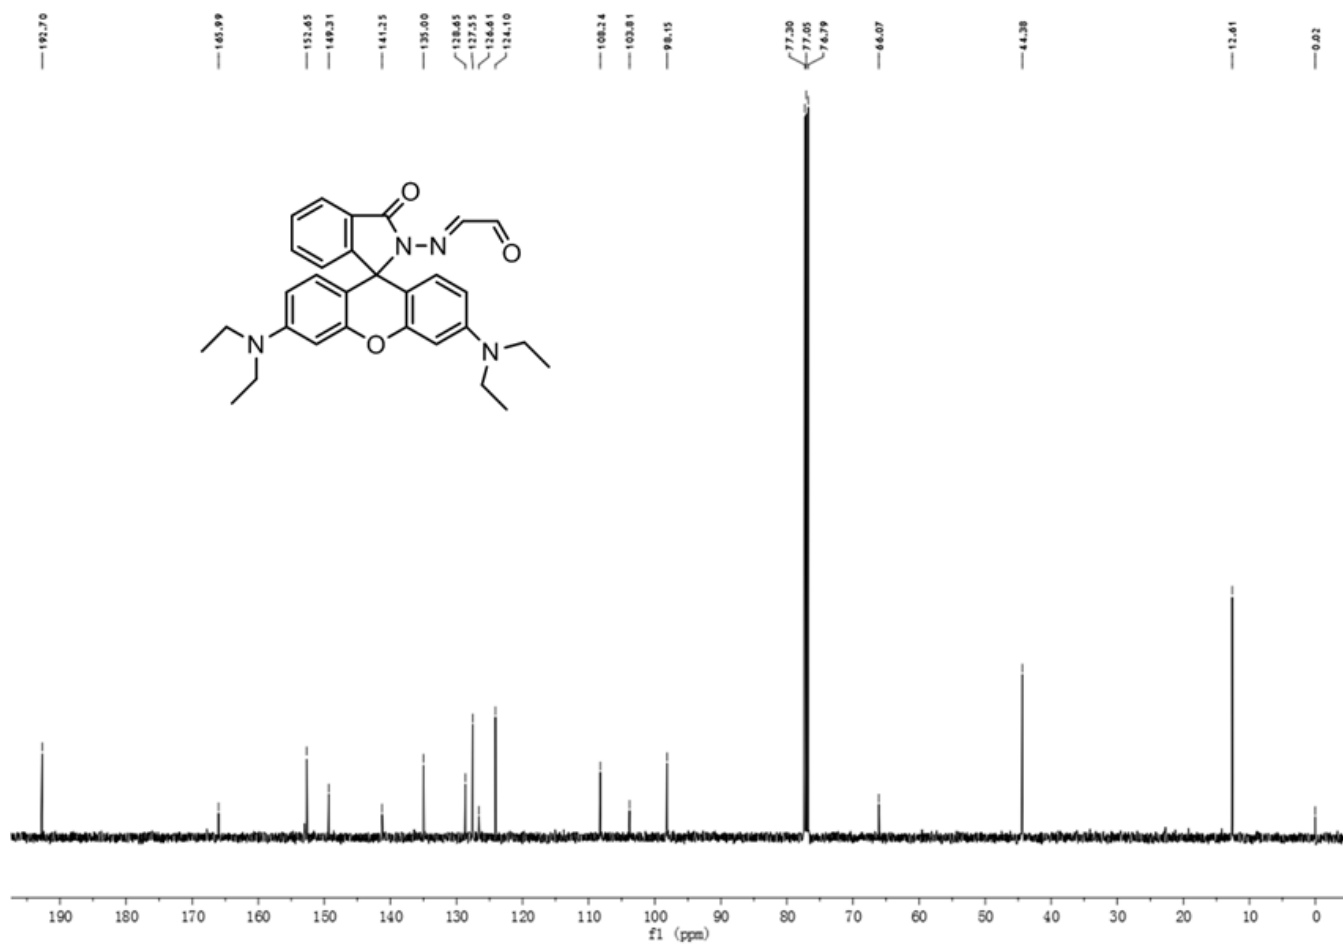

Figure S7. <sup>13</sup>C-NMR spectrum of Compound 2.

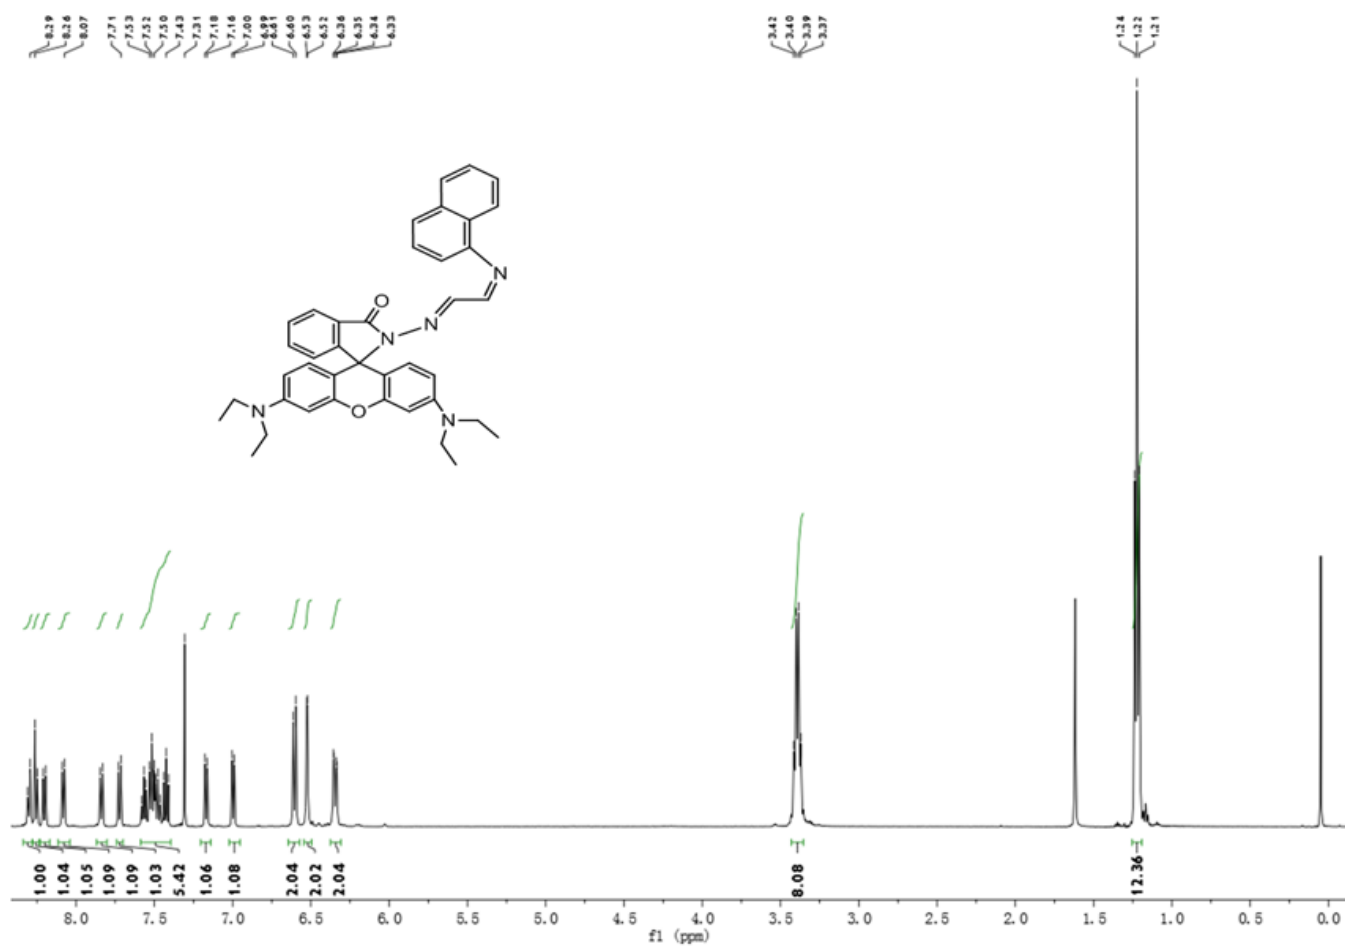

**Figure S8.** <sup>1</sup>H-NMR spectrum of RH-Fe.

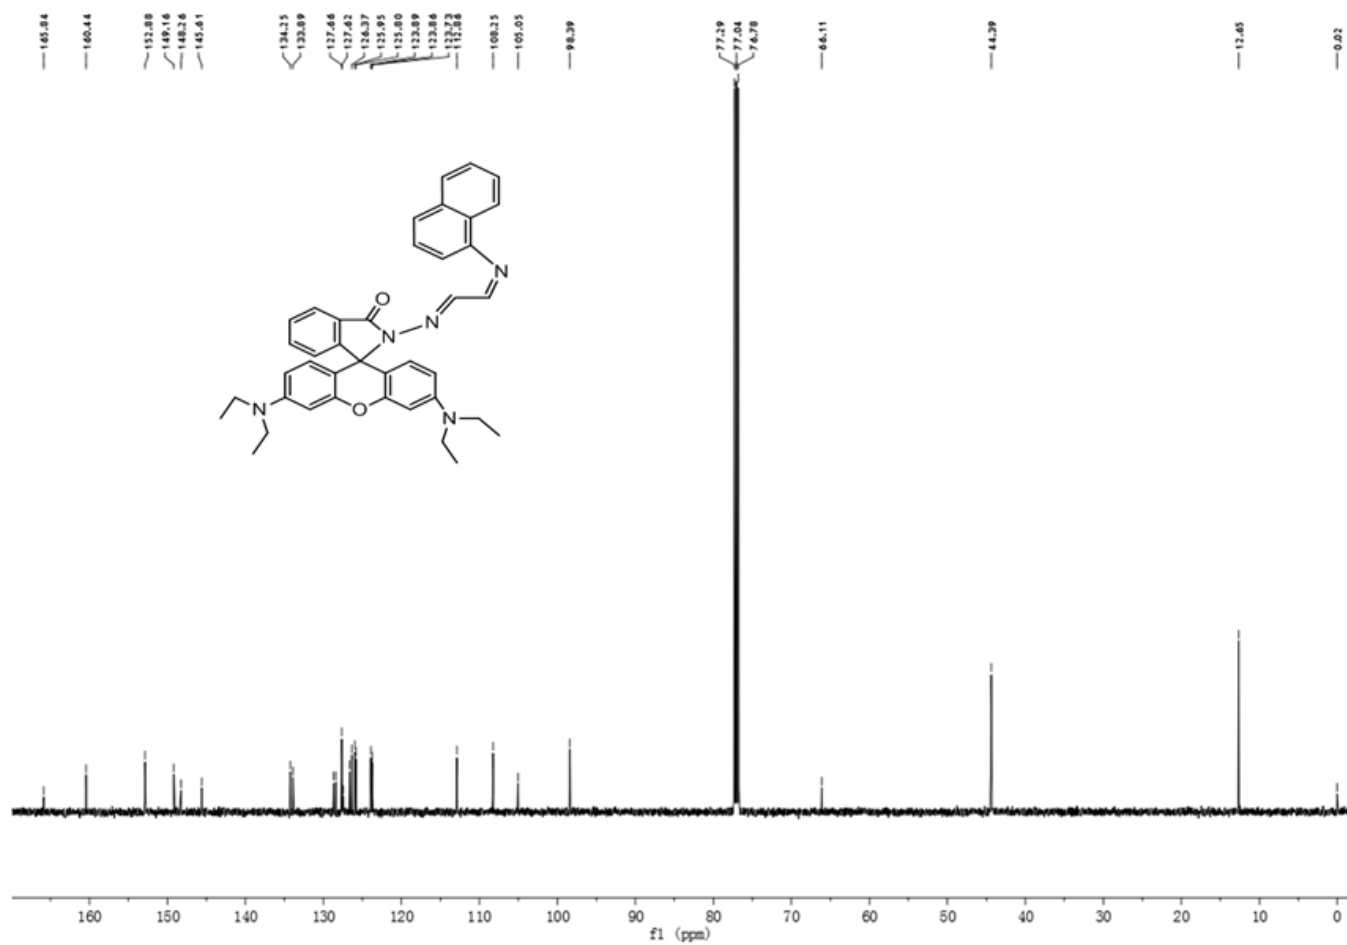

**Figure S9.** <sup>13</sup>C-NMR spectrum of RH-Fe.

[WJY]--HX1 #2-4 RT: 0.00-0.01 AV: 3 NL: 3.88E4  
T: ITMS + c ESI sid=35.00 Full ms [50.00-2000.00]

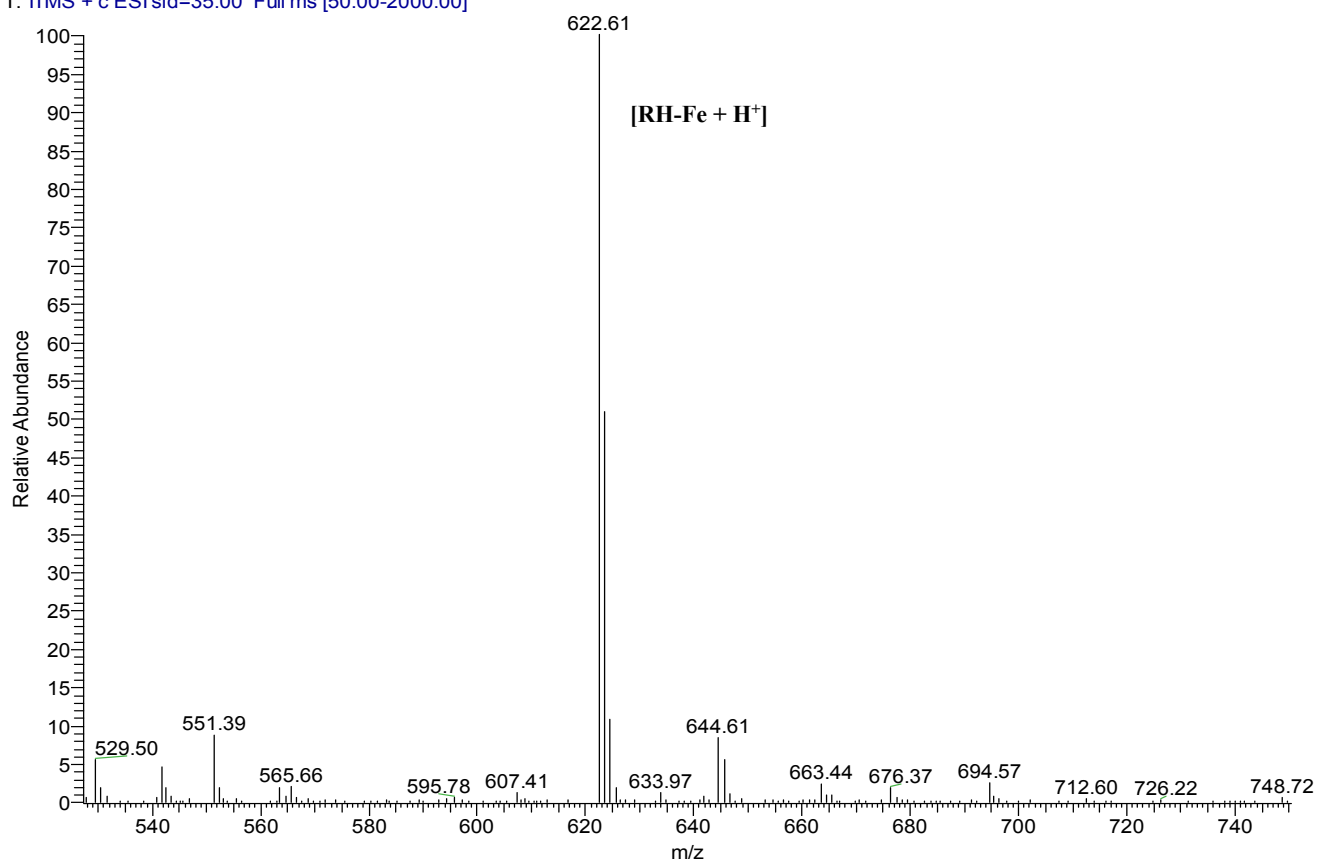

**Figure S10.** ESI-MS spectrum of RH-Fe.

[WJY]--HX-1 #54-61 RT: 0.73-0.82 AV: 8 NL: 4.45E2  
T: ITMS + c ESI sid=35.00 Full ms [100.00-2000.00]

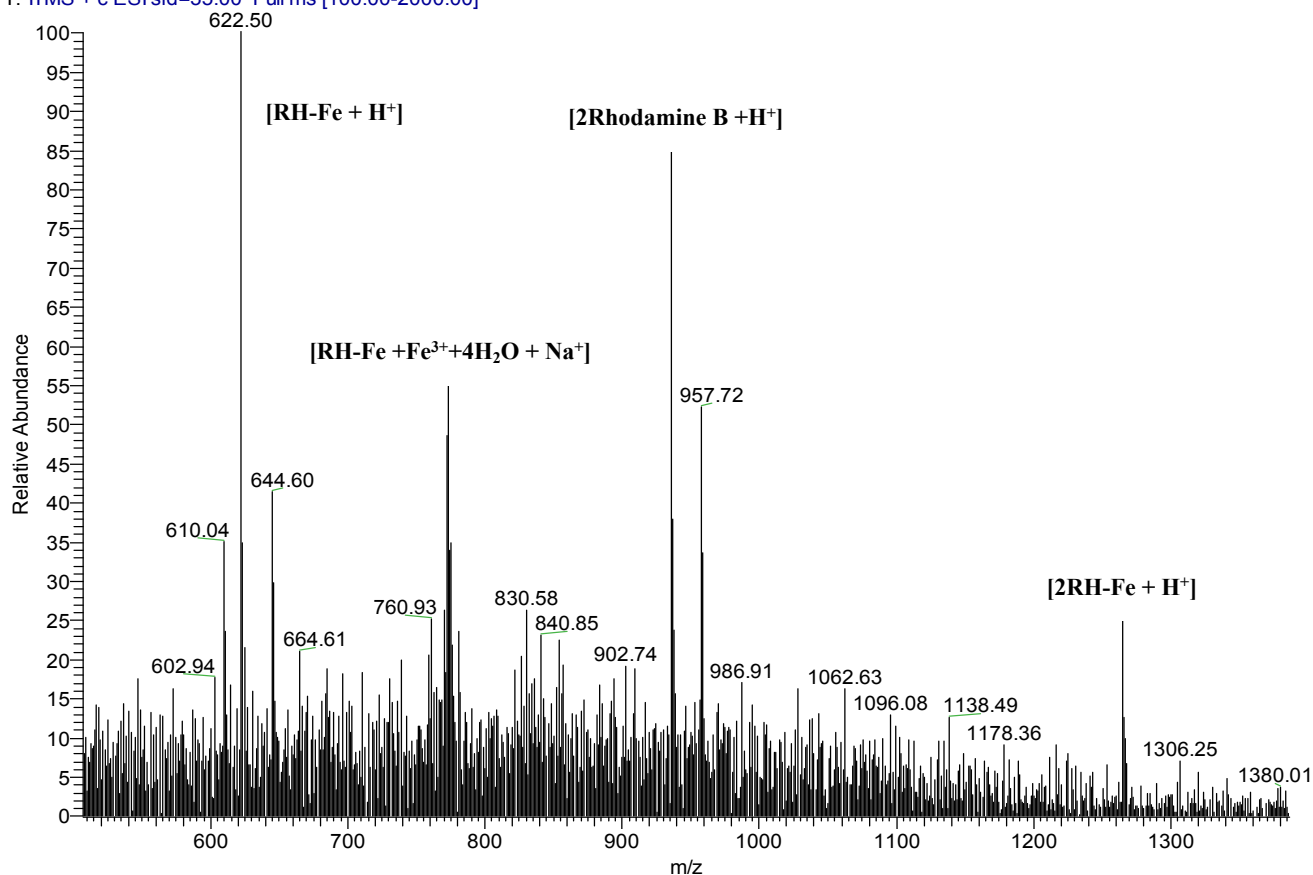

**Figure S11.** ESI-MS spectrum of RH-Fe in the presence of FeCl<sub>3</sub>.

### S9. References for the Supplementary Information.

[S1] X. B. Yang, B. X. Yang, J. F. Ge, Y. J. Xu, Q. F. Xu, J. Liang and J. M. Lu, *Org. Lett.*, 2011, **13**, 2710.

[S2] X. X. Fang, S. F. Zhang, G. Y. Zhao, W. W. Zhang, J. W. Xu, A. M. Ren, C. Q. Wu and W. Yang, *Dyes Pigments*, 2014, **101**, 58.

[S3] J. B. Li, Q. H. Hu, X. L. Yu, Y. Zhang, C. C. Cao, X. W. Liu, J. Guo and Z. Q. Pan, *J. Fluoresc.*, 2011, **21**, 2005.

[S4] Y. Q. Liu, Z. H. Xu, J. H. Wang, D. Zhang, Y. Ye and Y. F. Zhao, *Luminescence*, 2014, **29**, 945.

- [S5] R. Kagit, M. Yildirim, O. Ozay, S. Yesilotand H. Ozay, *Inorg. Chem.*, 2014, **53**, 2144.
- [S6] U. Fegade, H. Sharma, S. Attarde, N. Singh and A. Kuwar, *J. Fluoresc.*, 2014, **24**, 27.
- [S7] K. Velmurugan, J. Prabhu, L. J. Tang, T. Chidambaram, M. Noel, S. Radhakrishnand and R. Nandhakumar, *Anal. Methods*, 2014, **6**, 2883.
- [S8] V. Luxami, Renukamal, K. Paul and S. Kumar, *RSC Adv.*, 2013, **3**, 9189.
- [S9] M. Y. She, Z. Yang, B. Yin, J. Zhang, J. Gua, W. T. Yin, J. L. Lia, G. F. Zhao and Z. Shi, *Dyes Pigments*, 2012, **92**, 1337.
